# Supplementary material for: Advancing cancer therapy with a heptamethine carbocyanine dye-conjugated radionuclide drug
Source: Royal Society of Chemistry journal article supplement (doi:10.1039/d4tb01798f), 2024-11-01
Supplement: d4tb01798f1.pdf [file d4tb01798f1.pdf]

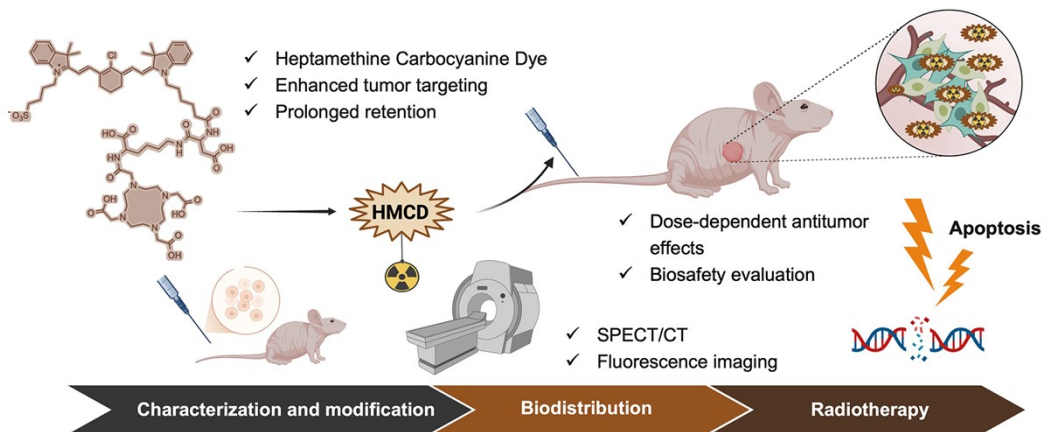

## Table of Contents Entry

## Results

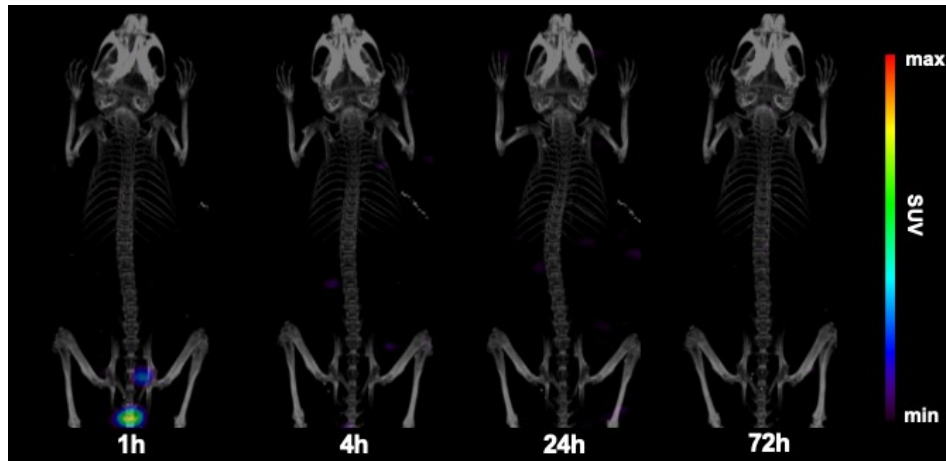

**Figure S1.** SPECT imaging of  $[^{177}\text{Lu}]\text{Lu-DOTA}$  on H1975 xenograft models.

**A**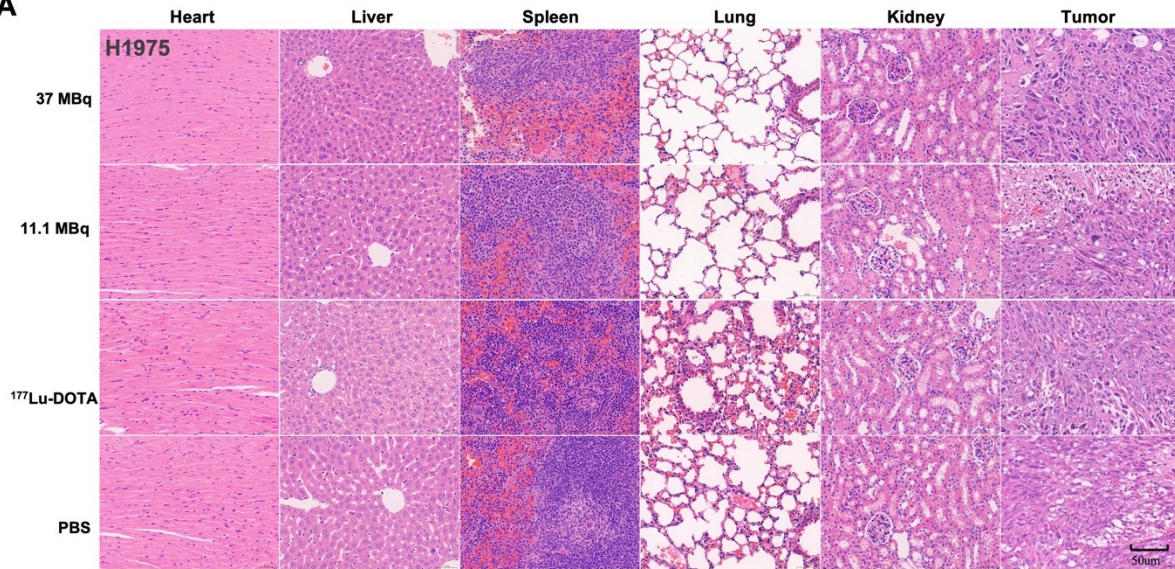

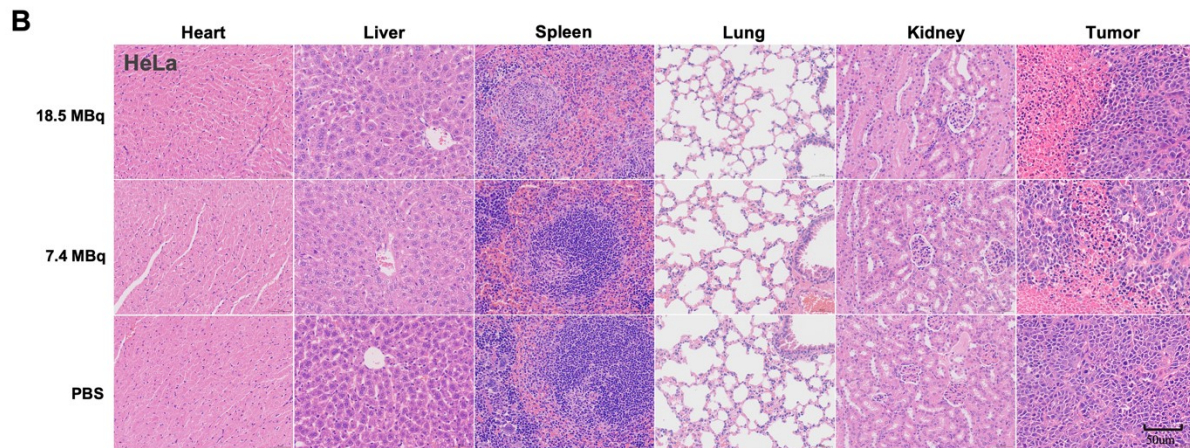

**Figure S2.** H&E staining was performed on major organs (heart, lung, liver, spleen, and kidney) and tumors for H1975 (A) and HeLa (B) xenograft models. Scale bar: 50  $\mu\text{m}$ .

*Animal SPECT image acquisition and processing*

**Table S1** summarizes the performance metrics of the animal SPECT scanner.

**Table S2** provides detailed information on animal SPECT image acquisition and processing parameters.

**Table S1. Characteristics of the Novel Medical animal SPECT scanner**

| <b>Imaging module</b> | <b>Performance metrics</b>            |                      |
|-----------------------|---------------------------------------|----------------------|
| <b>SPECT</b>          | Cross-sectional view                  | 70 mm                |
|                       | Axial effective field of view         | 250 mm               |
|                       | Spatial resolution                    | $\leq 1.5$ mm        |
|                       | Central detection efficiency          | $\geq 0.4\%$ (Tc99m) |
|                       | Energy Range                          | 80 keV–400 keV       |
|                       | Image Uniformity                      | $< 15\%$             |
| <b>CT</b>             | Maximum cross-sectional field of view | 70 mm                |
|                       | Maximum axial field of view           | 250 mm               |
|                       | High contrast resolution              | $\geq 6.25$ lp/mm    |
|                       | Low contrast resolution               | $\leq 3\%$           |

**Table S2. Image acquisition and processing data**

| <b>Imaging module</b> | <b>Scanning metrics</b>       |                      | <b>Reconstruction metrics</b> |             |
|-----------------------|-------------------------------|----------------------|-------------------------------|-------------|
| <b>CT</b>             | Voltage                       | 50 kV                | Displaying Matrix             | 512 x 512   |
|                       | Current                       | 0.5 mA               | Slices                        | 500         |
|                       | Total frames                  | 360                  | Filter                        | Soft        |
|                       | Single frame acquisition time | 2000 ms              | Pixel size                    | 0.136722 mm |
|                       | Step angle                    | 1.00°                | Slice thickness               | 0.18000 mm  |
| <b>SPECT</b>          | Scout image                   | Adopt CT scout image | Algorithm                     | OSEM        |
|                       | Acquisition time              | 25 min               | Displaying Matrix             | 60 x 60     |
|                       |                               |                      | Slices                        | 114         |
|                       |                               |                      | Iteration ordinal number      | 40          |
|                       |                               |                      | Pixel size                    | 0.70000 mm  |
|                       |                               |                      | Slice thickness               | 0.70000 mm  |

**Table S3. Fluorescence intensity-based quantitative analysis of DOTA-DZ-HX**

|                              |                                    | Time (h)     |                |               |              |
|------------------------------|------------------------------------|--------------|----------------|---------------|--------------|
|                              |                                    | 4            | 24             | 48            | 96           |
| <b>Tumor</b>                 | P/s/cm <sup>2</sup> /sr<br>(e+009) | 1.75 ± 0.10  | 1.83 ± 0.23    | 1.04 ± 0.13   | 0.49 ± 0.06  |
| <b>Tumor/<br/>background</b> | ratio                              | 98.95 ± 2.89 | 108.15 ± 10.75 | 80.12 ± 10.97 | 65.22 ± 8.01 |

**Table S4. Organ biodistribution of [<sup>177</sup>Lu]Lu-DOTA-DZ-HX in H1975 xenograft models\***

| Organ          | <sup>177</sup> Lu]Lu-DOTA-DZ-HX |                |                |                |                |               |
|----------------|---------------------------------|----------------|----------------|----------------|----------------|---------------|
|                | 1 h                             | 4 h            | 24 h           | 48 h           | 72 h           | 96 h          |
| <b>Blood</b>   | 36.715 ± 7.213                  | 24.936 ± 4.618 | 18.364 ± 6.168 | 7.831 ± 0.948  | 4.604 ± 0.732  | 0.685 ± 0.218 |
| <b>Heart</b>   | 8.199 ± 1.354                   | 6.430 ± 1.460  | 5.489 ± 0.668  | 3.705 ± 0.725  | 3.319 ± 0.501  | 0.935 ± 0.594 |
| <b>Liver</b>   | 7.302 ± 2.060                   | 5.788 ± 0.722  | 8.296 ± 0.452  | 8.127 ± 1.101  | 6.706 ± 0.724  | 2.335 ± 0.851 |
| <b>Spleen</b>  | 5.111 ± 1.441                   | 3.873 ± 0.684  | 5.726 ± 0.177  | 5.445 ± 0.916  | 5.313 ± 0.941  | 1.633 ± 0.906 |
| <b>Lung</b>    | 9.895 ± 1.946                   | 7.476 ± 0.863  | 5.391 ± 1.041  | 4.789 ± 0.759  | 3.835 ± 0.709  | 1.319 ± 0.557 |
| <b>Kidney</b>  | 11.562 ± 2.412                  | 14.228 ± 1.634 | 21.237 ± 2.254 | 22.129 ± 3.540 | 18.728 ± 3.240 | 7.099 ± 1.300 |
| <b>Stomach</b> | 3.550 ± 0.970                   | 2.986 ± 0.501  | 2.867 ± 0.275  | 1.728 ± 0.184  | 1.446 ± 0.279  | 0.454 ± 0.279 |



|                  |               |               |                |                |                |                |
|------------------|---------------|---------------|----------------|----------------|----------------|----------------|
| <b>Intestine</b> | 4.130 ± 1.605 | 3.854 ± 0.614 | 2.503 ± 0.436  | 1.984 ± 0.426  | 1.762 ± 0.518  | 0.518 ± 0.374  |
| <b>Muscle</b>    | 0.970 ± 0.338 | 1.580 ± 0.588 | 1.768 ± 0.592  | 1.500 ± 0.333  | 1.159 ± 0.171  | 0.234 ± 0.028  |
| <b>Bone</b>      | 5.754 ± 2.292 | 2.259 ± 0.888 | 1.867 ± 0.297  | 1.509 ± 0.495  | 1.089 ± 0.192  | 0.492 ± 0.203  |
| <b>Brain</b>     | 0.160 ± 0.023 | 0.762 ± 0.222 | 0.569 ± 0.363  | 0.275 ± 0.069  | 0.208 ± 0.046  | 0.054 ± 0.044  |
| <b>Tumor</b>     | 5.754 ± 0.292 | 8.697 ± 0.866 | 13.501 ± 1.401 | 12.645 ± 1.192 | 12.055 ± 1.387 | 2.764 ± 0.518  |
| <b>T/B</b>       | 0.160 ± 0.023 | 0.353 ± 0.029 | 0.779 ± 0.189  | 1.625 ± 0.164  | 2.632 ± 0.118  | 4.139 ± 0.572  |
| <b>T/L</b>       | 0.826 ± 0.182 | 1.517 ± 0.201 | 1.629 ± 0.165  | 1.590 ± 0.343  | 1.798 ± 0.076  | 1.235 ± 0.244  |
| <b>T/K</b>       | 0.512 ± 0.098 | 0.614 ± 0.056 | 0.638 ± 0.067  | 0.584 ± 0.121  | 0.649 ± 0.045  | 0.391 ± 0.055  |
| <b>T/M</b>       | 3.128 ± 0.495 | 6.294 ± 2.848 | 8.135 ± 2.239  | 8.723 ± 2.003  | 10.482 ± 1.165 | 11.794 ± 1.460 |

---

\*The data was in terms of %ID/g. The data are expressed as the mean  $\pm$  SD ( $n = 4$ /group; for 96h  $n = 3$ ), T/B: Tumor/Blood, T/L: Tumor/Liver, T/K: Tumor/Kidney, T/M: Tumor/Muscle.

**Table S5. Organ biodistribution of [<sup>177</sup>Lu]Lu-DOTA-DZ-HX in HeLa xenograft models\***

| Organ         | <sup>177</sup> Lu]Lu-DOTA-DZ-HX |                    |                    |                    |                    |
|---------------|---------------------------------|--------------------|--------------------|--------------------|--------------------|
|               | 4 h                             | 24 h               | 48 h               | 72 h               | 96 h               |
| <b>Blood</b>  | 37.471 $\pm$ 3.484              | 21.798 $\pm$ 2.698 | 10.056 $\pm$ 2.140 | 6.275 $\pm$ 0.600  | 4.692 $\pm$ 1.454  |
| <b>Heart</b>  | 10.163 $\pm$ 1.454              | 7.989 $\pm$ 1.249  | 4.854 $\pm$ 0.665  | 4.195 $\pm$ 0.109  | 3.953 $\pm$ 0.524  |
| <b>Liver</b>  | 8.931 $\pm$ 1.553               | 11.336 $\pm$ 1.021 | 9.242 $\pm$ 1.279  | 9.192 $\pm$ 0.356  | 8.193 $\pm$ 1.019  |
| <b>Spleen</b> | 6.251 $\pm$ 0.628               | 10.066 $\pm$ 1.166 | 6.935 $\pm$ 1.636  | 8.565 $\pm$ 2.325  | 6.998 $\pm$ 1.992  |
| <b>Lung</b>   | 15.982 $\pm$ 1.754              | 12.323 $\pm$ 2.034 | 6.755 $\pm$ 0.289  | 6.712 $\pm$ 1.417  | 4.005 $\pm$ 0.609  |
| <b>Kidney</b> | 19.447 $\pm$ 1692               | 31.900 $\pm$ 1.088 | 25.780 $\pm$ 5.471 | 29.078 $\pm$ 2.768 | 25.091 $\pm$ 4.738 |

|                  |                |                |                |                |                |
|------------------|----------------|----------------|----------------|----------------|----------------|
| <b>Stomach</b>   | 4.975 ± 0.554  | 4.377 ± 0.226  | 2.416 ± 0.634  | 2.234 ± 0.083  | 2.476 ± 1.044  |
| <b>Intestine</b> | 5.912 ± 1.470  | 6.352 ± 3.061  | 2.719 ± 0.970  | 2.795 ± 0.714  | 2.846 ± 0.409  |
| <b>Muscle</b>    | 2.800 ± 0.896  | 2.259 ± 0.406  | 1.533 ± 0.237  | 1.706 ± 0.202  | 1.525 ± 0.309  |
| <b>Bone</b>      | 3.949 ± 0.751  | 2.875 ± 0.498  | 1.750 ± 0.456  | 2.157 ± 0.383  | 1.438 ± 0.301  |
| <b>Brain</b>     | 0.804 ± 0.174  | 0.547 ± 0.049  | 0.313 ± 0.073  | 0.306 ± 0.182  | 0.208 ± 0.058  |
| <b>Tumor</b>     | 11.892 ± 1.012 | 17.647 ± 4.098 | 16.522 ± 3.029 | 14.409 ± 2.743 | 11.938 ± 1.003 |
| <b>T/B</b>       | 0.319 ± 0.032  | 0.804 ± 0.123  | 1.659 ± 0.220  | 2.297 ± 0.372  | 2.672 ± 0.549  |
| <b>T/L</b>       | 1.350 ± 0.163  | 1.545 ± 0.271  | 1.798 ± 0.338  | 1.563 ± 0.247  | 1.463 ± 0.073  |
| <b>T/K</b>       | 0.617 ± 0.096  | 0.551 ± 0.116  | 0.647 ± 0.097  | 0.494 ± 0.065  | 0.485 ± 0.063  |

|            |               |               |                |               |               |
|------------|---------------|---------------|----------------|---------------|---------------|
| <b>T/M</b> | 4.600 ± 1.542 | 7.772 ± 1.061 | 11.079 ± 3.119 | 8.439 ± 1.081 | 8.012 ± 1.267 |
|------------|---------------|---------------|----------------|---------------|---------------|

---

\* The data was in terms of %ID/g. The data are expressed as the mean ± SD ( $n = 4/\text{group}$ ), T/B: Tumor/Blood, T/L: Tumor/Liver, T/K: Tumor/Kidney, T/M: Tumor/Muscle.

**Table S6. The H1975 tumor volume of each group\***

| H1975 Group                                | Tumor volume (mm <sup>3</sup> ) |                           | Tumor Growth Inhibition (%) at the end of the therapy |
|--------------------------------------------|---------------------------------|---------------------------|-------------------------------------------------------|
|                                            | at the beginning of the therapy | at the end of the therapy |                                                       |
| 37 MBq [ <sup>177</sup> Lu]Lu-DOTA-DZ-HX   | 33.59 ± 8.76                    | 10.01 ± 2.75              | 96.18                                                 |
| 11.1 MBq [ <sup>177</sup> Lu]Lu-DOTA-DZ-HX | 30.77 ± 3.55                    | 15.48 ± 7.51              |                                                       |
| 37 MBq [ <sup>177</sup> Lu]Lu-DOTA         | 32.91 ± 7.23                    | 196.16 ± 77.37            |                                                       |
| PBS                                        | 35.81 ± 11.42                   | 279.37 ± 115.53           |                                                       |

\*The data are expressed as the mean ± SD (*n* = 5/group).

**Table S7. The HeLa tumor volume and weight of each group\***

| HeLa Group                                 | Tumor volume (mm <sup>3</sup> ) |                           | Tumor weight | Tumor Growth Inhibition (%) at the end of the therapy |
|--------------------------------------------|---------------------------------|---------------------------|--------------|-------------------------------------------------------|
|                                            | at the beginning of the therapy | at the end of the therapy |              |                                                       |
| 18.5 MBq [ <sup>177</sup> Lu]Lu-DOTA-DZ-HX | 80.86 ± 11.19                   | 71.52 ± 28.86             | 0.04 ± 0.01  | 89.74                                                 |
| 7.4 MBq [ <sup>177</sup> Lu]Lu-DOTA-DZ-HX  | 73.66 ± 7.52                    | 86.41 ± 23.76             | 0.06 ± 0.02  |                                                       |
| PBS                                        | 86.97 ± 6.55                    | 749.67 ± 154.30           | 0.64 ± 0.15  |                                                       |

\*The data are expressed as the mean ± SD (*n* = 5/group).

**Table S8. Quantitative Evaluation of Tumor Tissue Apoptosis and Immunohistochemical Profiling\***

| Tumor | Apoptosis rate (%) |              |             | % DAB Positive Tissue |         |
|-------|--------------------|--------------|-------------|-----------------------|---------|
|       | High               | Low          | PBS         | HIF-1α                | OATP2B1 |
| H1975 | 60.92 ± 7.60       | 18.57 ± 7.37 | 2.02 ± 0.41 | 38.86                 | 32.15   |
| HeLa  | 27.30 ± 10.49      | 13.28 ± 0.03 | 0.00 ± 0.00 | 58.87                 | 79.38   |

\*The data are expressed as the mean ± SD (*n* = 3/group).
